# Supplementary material for: Cell entry of a host-targeting protein of oomycetes requires gp96
Source: PubMed Central journal article supplement (PMC6002402; doi:10.1038/s41467-018-04796-3), 2018-06-14
Supplement: 41467_2018_4796_MOESM1_ESM.pdf [file 41467_2018_4796_MOESM1_ESM.pdf]

## SUPPORTING INFORMATION

### Cell entry of a host targeting protein of oomycetes requires gp96

*Trusch et al.*

Trusch F, Loebach L, Wawra S, Durward E, Wuensch A, Ibrahimi NA, de Bruijn I, MacKenzie K, Willems A, Toloczko A, Diéguez-Uribeondo J, Rasmussen T, Schrader T, Bayer P, Secombes CJ, van West P

#### Content:

|                         |        |
|-------------------------|--------|
| Supplementary Figure 1  | page 2 |
| Supplementary Figure 2  | page 3 |
| Supplementary Figure 3  | page 4 |
| Supplementary Figure 4  | page 5 |
| Supplementary Table 1   | page 6 |
| Supplementary Table 2   | page 7 |
| Original gels and blots | page 8 |

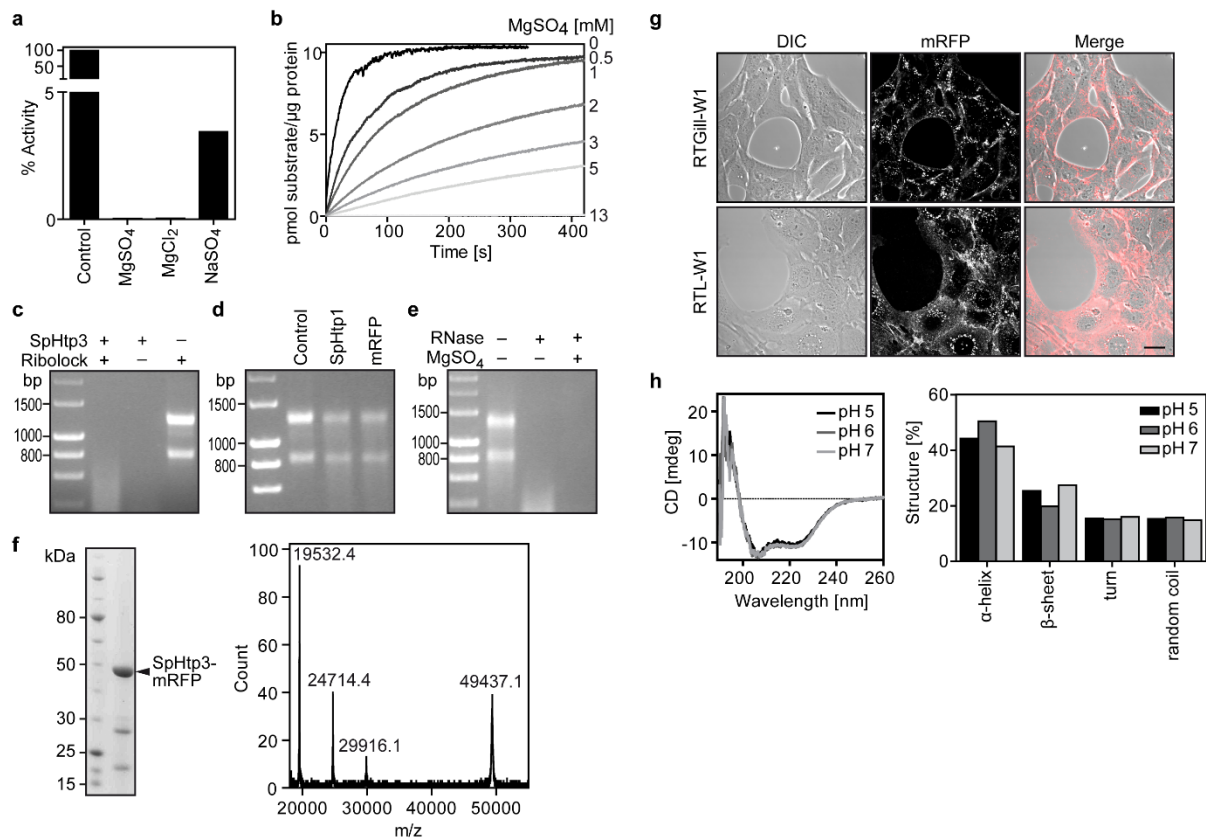

**Supplementary Figure 1. Nuclease activity and self-translocation of SpHtp3.** (a) Impact of different salt ions ( $\text{MgSO}_4$ ,  $\text{MgCl}_2$ ,  $\text{NaSO}_4$ , 25 mM each) on the ribonuclease activity of SpHtp3. Enzyme activities of different salt treatments were normalized to a control sample without additional salts (25 mM HEPES; 100 % activity). (b) Real time fluorescent monitoring of the ribonuclease activity of SpHtp3 at different  $\text{MgSO}_4$  concentrations as indicated using a fluorescently tagged RNA substrate under the control of a quencher (RNaseAlert<sup>(R)</sup>, Applied Biosystems). (c) RNase activity visualized by an agarose gel. RNA degradation cannot be inhibited by Ribolock, which excludes potential impurities from the purification process of SpHtp3. (n=2) (d) Proteins (SpHtp1-mRFP and mRFP) which were purified in the same way as SpHtp3 do not show any nuclease activity. (n=2) (e) RNA degrading properties of RNase A. In contrast to SpHtp3 the activity of RNase A cannot be inhibited by 40 mM  $\text{MgSO}_4$ . (n=2) (f) Purity of recombinant proteins, overexpressed in and purified from *E. coli*, used in this study exemplarily shown for SpHtp3-mRFP confirmed by SDS-PAGE (left) and MALDI-TOF (right). Analysis reveals pure SpHtp3-mRFP (theoretical mass: 49.4 kDa) with two degradation bands from mRFP (confirmed by LC-MS/MS). (g) Self-translocation of SpHtp3-mRFP into living epithelial RTGill-W1 cells (top) and RTL-W1 cells (bottom) after 1 h incubation at 18 °C. (n=3) (h) CD spectra of C-terminal His<sub>6</sub>-tagged SpHtp3 in  $\text{NaPi}$  buffer at pH 5.0, 6.0 and 7.0 (left). Corresponding prediction of secondary structure elements from CD spectra using the CDSSTR tool (right).

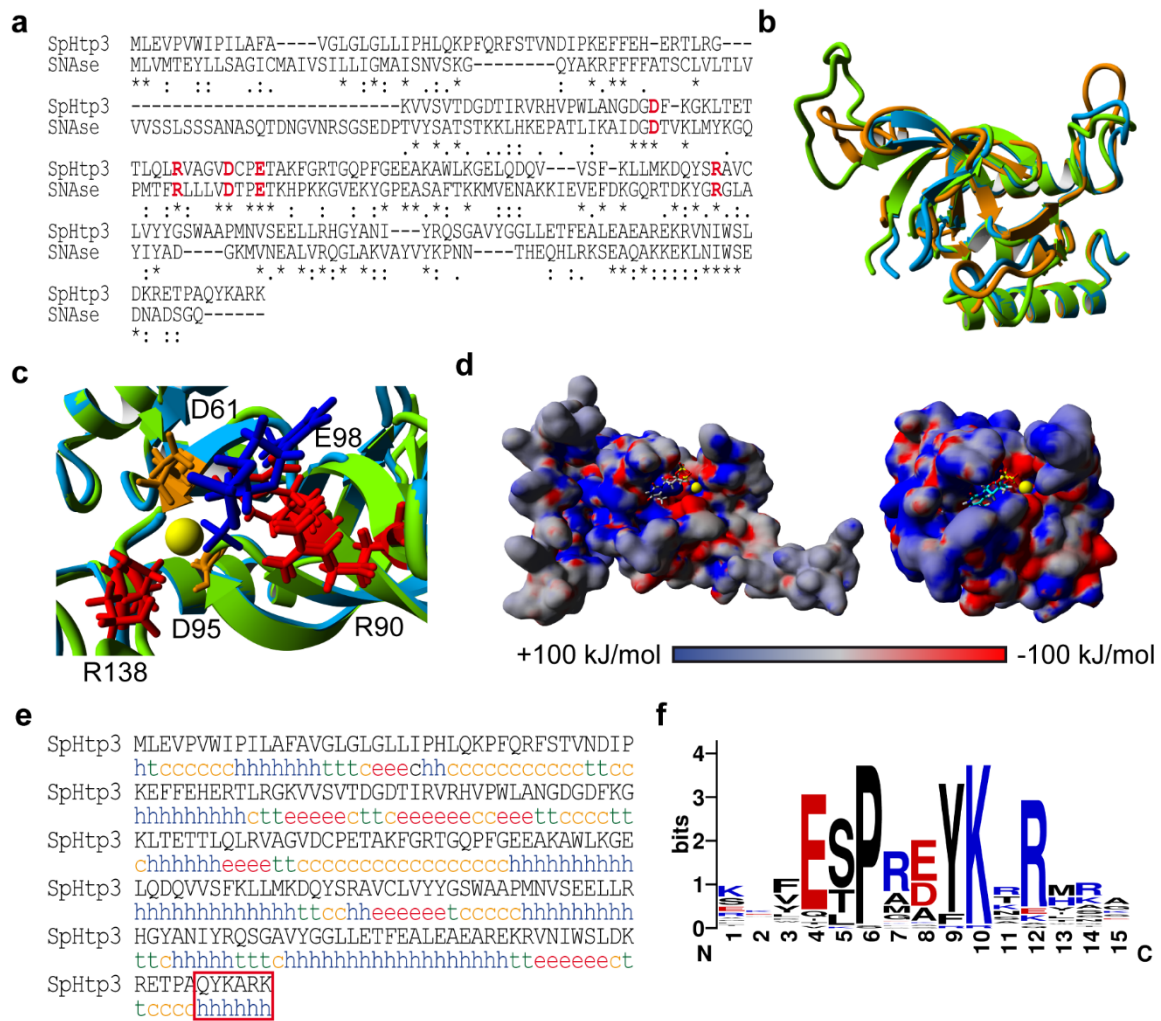

**Supplementary Figure 2. SpHtp3 comprises dual nuclease activity.** (a) Sequence alignment of SpHtp3 from *S. parasitica* and SNase from *S. aureus* (30% identity) with Clustal Omega. Active side residues are highlighted. (b) Overlay of the X-ray structure of SNase (blue, PDB-ID: 1NUC), the YASARA-based SpHtp3 model (green) and Phyre2-based SpHtp3-model (orange) shows a reasonable similarity between both nucleases despite the low sequence identity. (c) Magnification of the active site of an overlay of the structures of SNase (blue) and the YASARA-based SpHtp3 model (green). Residues of the  $\text{Ca}^{2+}$  binding site (D61 and D95, orange), the catalytic triade (R90, E98 and R138, red) and ligands ( $\text{Ca}^{2+}$ : yellow, nucleotide analogue: blue) are labelled according to the SpHtp3 model. (d) Electrostatic surface potential presentation of SpHtp3 (left) compared to SNase (right) showing the active site. Positive, neutral, and negative charges are displayed in blue, gray, and red as indicated, respectively. (e) Secondary structure prediction of SpHtp3<sub>21-211</sub> by SOPMA. The C-terminal helix is highlighted. c: random coil, e: extended strand, h: helix, t: turn. (f) Weblogo of the conserved C-terminus of SpHtp3 and SpHtp3-like nucleases from 41 different pathogenic fungi and oomycetes (Supplementary Table 1).

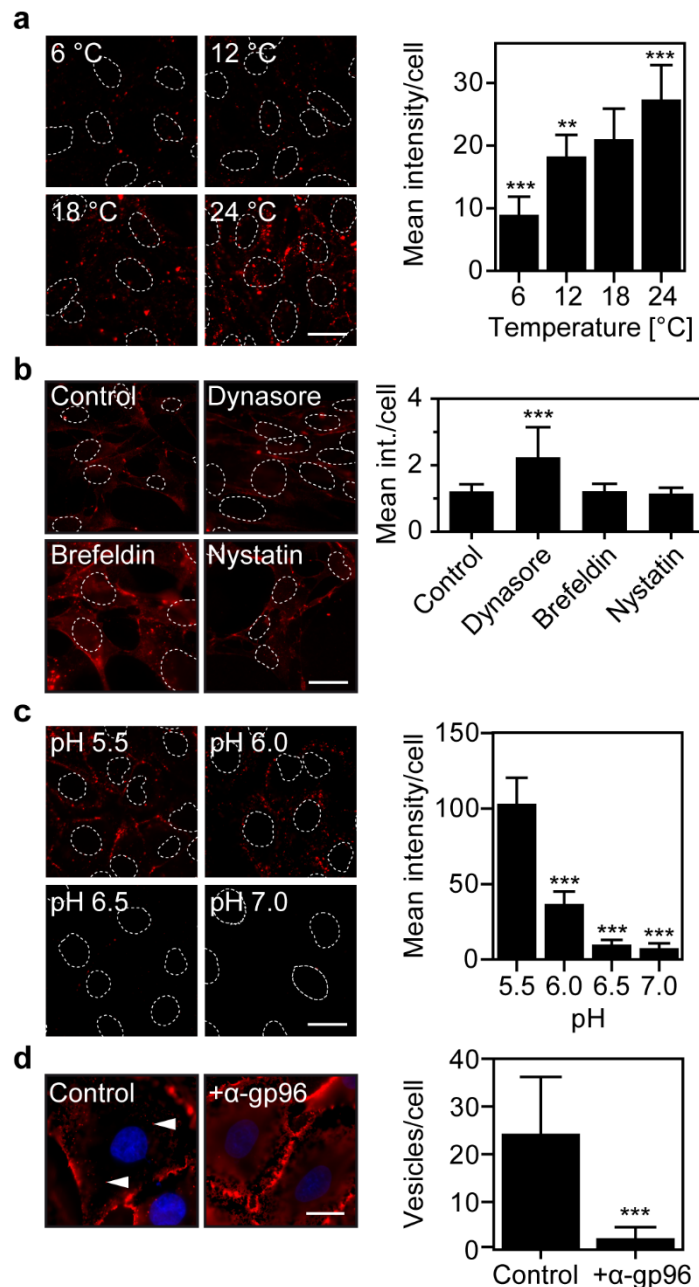

**Supplementary Figure 3. Conditions for the successful uptake of SpHtp3. (a)** Uptake of SpHtp3-mRFP into RTG-2 cells after 1 h of incubation at different temperatures as indicated (left) and quantitative analysis (right). Nuclei are indicated by dashed lines. Error bars denote s.e.m. (cells: 50). \*\*\*  $p < 0.001$  (one way ANOVA). Scale bar: 20  $\mu\text{m}$ . (n=3) **(b)** Uptake inhibition of SpHtp1-mRFP into RTG-2 cells pre-incubated for 1 h with the inhibitors dynasore, brefeldin A or nystatin (top) and respective quantification (bottom). Nuclei are indicated by dashed lines. Error bars denote s.e.m. (cells: 50). \*\*\*  $p < 0.001$ , \*\*  $p < 0.01$  (one way ANOVA). Scale bar: 20  $\mu\text{m}$ . (n=3) **(c)** Uptake of SpHtp3-mRFP into human A549 cells after 1 h of incubation at different pH values as indicated (left) and quantitative analysis (right). Nuclei are indicated by dashed lines. Error bars denote s.e.m. (cells: 50). \*\*\*  $p < 0.001$  (one way ANOVA). (n=3) **(d)**  $\alpha$ -gp96 antibody mediated uptake inhibition of SpHtp3-mRFP into human A549 cells after 1 h incubation at pH 5.5. The number of vesicles (arrowheads) is significantly reduced in the antibody-treated sample. Pictures were taken with a Zeiss Imager M2. Error bars denote s.e.m. (cells: 50). \*\*\*  $p < 0.001$  (t-test). Scale bar: 20  $\mu\text{m}$ . (n=3)

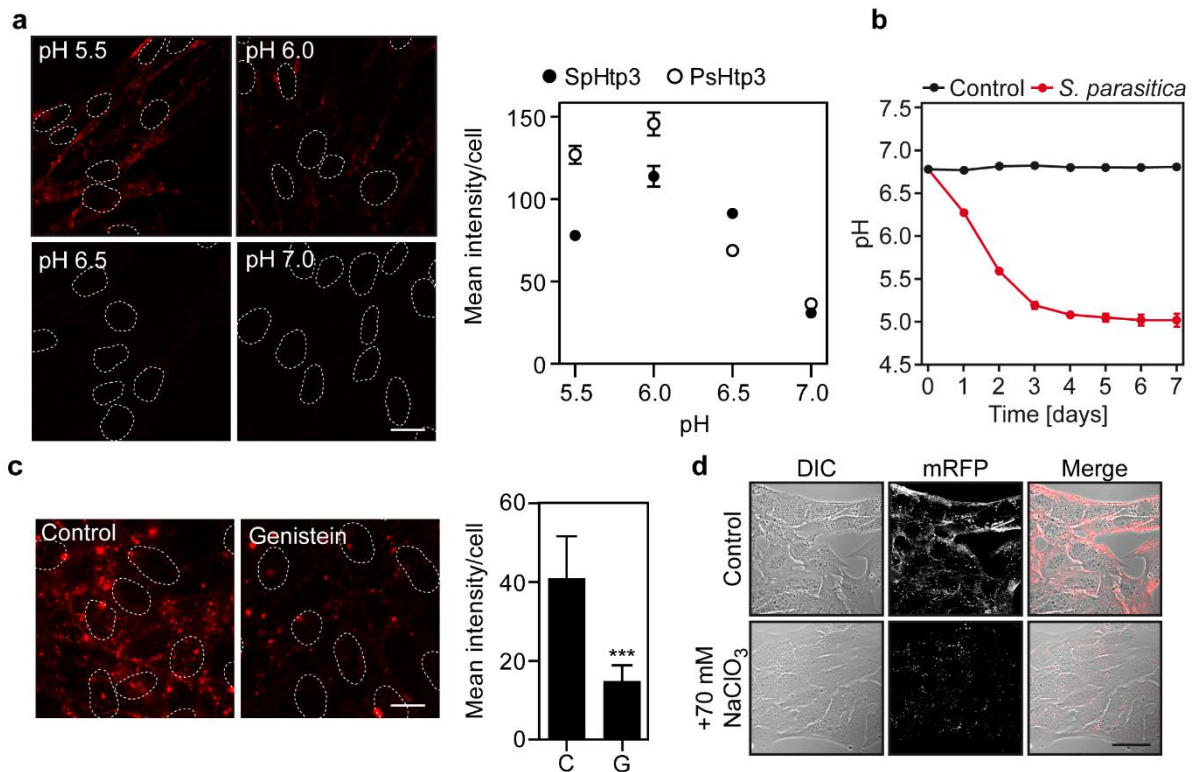

**Supplementary Figure 4. The SpHtp3 uptake is dependent on the pH on several levels. (a)** Uptake of the SpHtp3 homologue PsHtp3-mRFP from *P. sojiae* into RTG-2 fish cells after 1 h of incubation at different pH values as indicated (left) and quantitative analysis (right). Nuclei are indicated by dashed lines. Error bars denote s.e.m. (cells: 50). Scale bar: 20  $\mu$ m. (n=3) **(b)** Effect of *S. parasitica* growth on the environmental pH in liquid broth. After 3 days of growth (red) the pH decreased from 6.78 to 5 while the control sample (black) shows a constant pH over time. Error bars denote SD (n=3). **(c)** Self-translocation of SpHtp3-mRFP into RTG-2 cells pre-incubated for 1 h with the inhibitor genistein (inhibition of tyrosine kinases) at pH 5.5. Nuclei are indicated by dashed lines. Error bars denote s.e.m. (cells: 50). \*\*\*  $p < 0.001$  (t-test). Pictures were taken with a Zeiss Imager M2. Scale bar: 20  $\mu$ m. (n=3) **(d)** Autonomous translocation activity of SpHtp3-mRFP into living RTG-2 cells pre-incubated for 48 h with the sulfation inhibitor NaClO<sub>3</sub> (70 mM) at pH 5.5. Scale bar: 20  $\mu$ m. (n=3)

**Supplementary Table 1. SpHtp3-like nucleases from other pathogenic fungi and oomycetes**

| accession number | species                             | pathogenicity   | signal    | prediction | Snase fold |
|------------------|-------------------------------------|-----------------|-----------|------------|------------|
| 770304069        | <i>Aspergillus parasiticus</i>      | human           | anchor    | 0.56       | 7.30E-21   |
| 662522722        | <i>Aureobasidium pullulans</i>      | plants          | anchor    | 0.641      | 9.40E-25   |
| 701776548        | <i>Beauveria bassiana</i>           | arthropods      | anchor    | 0.596      | 2.20E-25   |
| 646295409        | <i>Botryobasidium botryosum</i>     | wood decay      | secretion | 0.938      | 6.00E-23   |
| 477537143        | <i>Colletotrichum orbiculare</i>    | melon, cucumber | anchor    | 0.843      | 1.30E-21   |
| 663447725        | <i>Cyberlindnera fabianii</i>       | human           | secretion | 0.661      | 3.40E-20   |
| 45198453         | <i>Eremothecium gossypii</i>        | cotton          | secretion | 0.626      | 2.60E-22   |
| 800921033        | <i>Hanseniaspora uvarum</i>         | human           | anchor    | 0.628      | 8.90E-25   |
| 799244733        | <i>Hirsutella minnesotensis</i>     | soybean         | anchor    | 0.939      | 1.20E-19   |
| 574143861        | <i>Kluyveromyces marxianus</i>      | human           | anchor    | 0.596      | 8.20E-26   |
| 396472204        | <i>Leptosphaeria maculans</i>       | crops           | anchor    | 0.817      | 4.90E-25   |
| 389632065        | <i>Magnaporthe oryzae</i>           | plants          | anchor    | 0.652      | 2.10E-24   |
| 835895603        | <i>Magnaporthiopsis poae</i>        | grass           | anchor    | 0.751      | 1.30E-21   |
| 597572499        | <i>Marssonina brunnea</i>           | plants          | anchor    | 0.777      | 4.90E-26   |
| 734659414        | <i>Metarhizium album</i>            | plants          | anchor    | 0.789      | 1.60E-24   |
| 634347841        | <i>Microbotryum violaceum</i>       | plants          | anchor    | 0.733      | 5.30E-24   |
| 74644366         | <i>Nakaseomyces delphensis</i>      | human (?)       | secretion | 0.514      | 4.40E-24   |
| 530542102        | <i>Nosema apis</i>                  | bees            | anchor    | 0.992      | 8.20E-25   |
| 927380789        | <i>Ogataea parapolyomorpha</i>      | insect          | secretion | 0.605      | 4.70E-24   |
| 531866348        | <i>Ophiocordyceps sinensis</i>      | moths larvae    | anchor    | 0.743      | 1.80E-23   |
| 859270412        | <i>Penicillium brasilianum</i>      | onion           | anchor    | 0.839      | 1.20E-20   |
| 599391454        | <i>Phanerochaete carnosa</i>        | plane trees     | secretion | 0.982      | 1.80E-14   |
| 695456669        | <i>Phytophthora sojae</i>           | soybean         | anchor    | 0.985      | 6.40E-23   |
| 695113319        | <i>Pichia kudriavzevii</i>          | human           | secretion | 0.951      | 5.30E-25   |
| 750968359        | <i>Pisolithus microcarpus</i>       | ectomycorrhizum | secretion | 0.813      | 7.60E-11   |
| 430814188        | <i>Pneumocystis jirovecii</i>       | human           | anchor    | 0.778      | 2.10E-24   |
| 913866265        | <i>Puccinia sorghi</i>              | maize           | secretion | 0.772      | 1.20E-18   |
| 189203167        | <i>Pyrenophora tritici-repentis</i> | plants          | anchor    | 0.939      | 1.90E-24   |
| 751838924        | <i>Rhizoctonia solani</i>           | plants          | anchor    | 0.69       | 2.40E-16   |
| 472582507        | <i>Rhodospidium toruloides</i>      | bovine          | anchor    | 0.758      | 5.70E-24   |
| 813128551        | <i>Saprolegnia parasitica</i>       | fish            | secretion | 0.737      | 7.90E-23   |
| 666868197        | <i>Scedosporium apiospermum</i>     | human           | anchor    | 0.797      | 1.10E-23   |
| 453082712        | <i>Sphaerulina musiva</i>           | poplar trees    | anchor    | 0.649      | 8.80E-21   |
| 523777553        | <i>Spraguea lophii</i>              | fish            | anchor    | 0.926      | 1.30E-19   |
| 367042838        | <i>Thielavia terrestris</i>         | human           | anchor    | 0.666      | 2.70E-22   |
| 367016471        | <i>Torulaspora delbrueckii</i>      | human           | secretion | 0.649      | 4.10E-24   |
| 440493309        | <i>Trachipleistophora hominis</i>   | human           | secretion | 0.999      | 1.10E-25   |
| 296421569        | <i>Tuber melanosporum</i>           | ectomhyrization | anchor    | 0.501      | 7.90E-19   |
| 632915299        | <i>Ustilagoideae virens</i>         | rice            | anchor    | 0.926      | 6.50E-24   |
| 667635355        | <i>Vavraia culicis</i>              | mosquito        | secretion | 0.889      | 9.90E-26   |
| 685941421        | <i>Wallemia ichthyophaga</i>        | human           | anchor    | 0.593      | 4.90E-24   |
| 796695363        | <i>Zyloseptoria brevis</i>          | grass           | anchor    | 0.695      | 2.80E-21   |

Prediction of a secretion signal or membrane anchor for secretion was performed with SignalP 2.0 and prediction of a SNase fold for a dual nuclease function was done with Pfam-A domain search.

**Supplementary Table 2. Analysis of the additional band from SDS-PAGE after crosslink**

| Accession    | Description | Score   | Coverage | # Unique Peptides | # Peptides | # PSMs | # AAs | MW [kDa] |
|--------------|-------------|---------|----------|-------------------|------------|--------|-------|----------|
| SPRG_03573T0 | SpHtp3      | 1550.47 | 70.62    | 22                | 22         | 65     | 211   | 23.8     |
| SPRG_04986T0 | SpHtp1      | 135.09  | 24.00    | 4                 | 4          | 8      | 200   | 21.6     |
| SPRG_07885T0 | histone H4  | 28.19   | 21.78    | 2                 | 2          | 2      | 101   | 11.3     |
| SPRG_15039T0 | unknown     | 27.13   | 1.80     | 1                 | 1          | 1      | 724   | 79.7     |
| SPRG_14283T0 | unknown     | 23.68   | 1.60     | 1                 | 1          | 1      | 501   | 55.8     |
| SPRG_04290T0 | unknown     | 20.96   | 0.66     | 1                 | 1          | 1      | 1213  | 133.3    |

SpHtp1-His<sub>6</sub> and SpHtp3-His<sub>6</sub> were co-incubated and cross linked with 4 % PFA/PBS (Fig. 6). An additional band appeared which contained peptides for both proteins according to LC-MS/MS analysis.

Fig. 2b

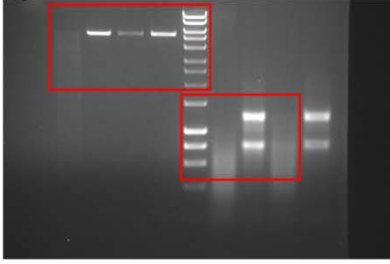

Fig. 4c

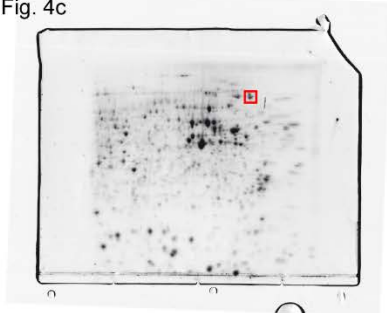

Fig. 4c

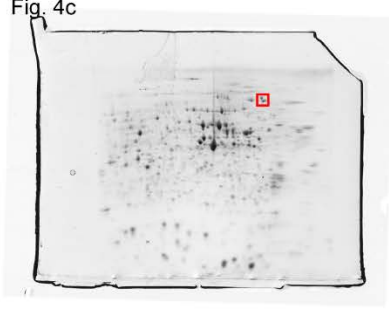

Fig. 4c

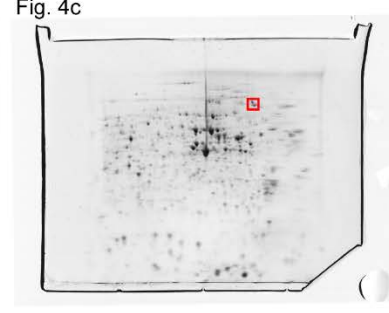

Fig. 4d

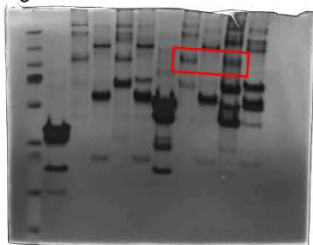

Fig. 4e

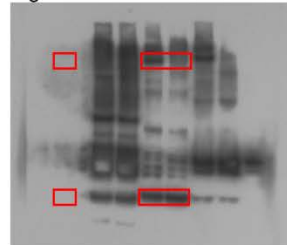

Fig. 4f

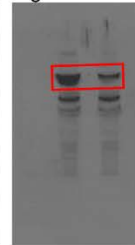

Fig. 4f

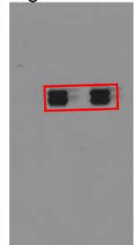

Fig. 6f

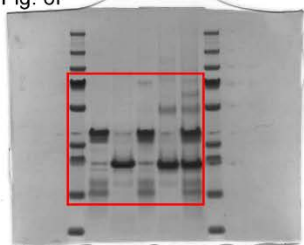

Fig. S1c

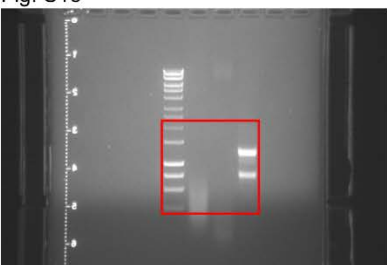

Fig. S1d

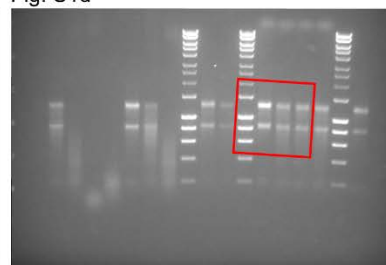

Fig. S1e

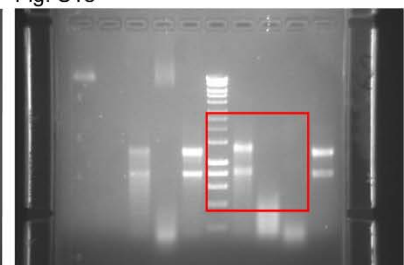

**Originals**
